1 Student perceptions of cardiovascular physiology module format in a preclinical medical science

2 course

3

4 Kristen Scherrer<sup>1¶</sup>, Spencer Sullivan<sup>1¶</sup>, Gary Beck Dallaghan<sup>1</sup>, Emily Moorefield<sup>1</sup>

5

6 <sup>1</sup>University of North Carolina School of Medicine at Chapel Hill, NC, USA

7

8

9 \*Corresponding author

10 E-mail: [emily\\_moorefield@med.unc.edu](mailto:emily_moorefield@med.unc.edu) (EM)

11

12

13 ¶ These authors contributed equally to this work.

14

15

16

17

18

19

20

21 **Abstract:**

22 Positive active learning outcomes require student engagement with foundational, preparatory material  
23 prior to class. The current study involved thorough updating of cardiovascular physiology module  
24 format. It then examined preclinical medical student perceptions, and midterm exam performance, after  
25 using different preparatory module formats that were reviewed prior to participating in interactive  
26 classroom sessions. Modules that were initially created in Articulate Storyline were updated in Articulate  
27 Rise360 and introduced over a 3-year period. Both module styles contained the same cardiovascular  
28 physiology content, but updated Rise360 modules presented content in multiple formats to capture a  
29 variety of student learning preferences and divided each concept into several smaller topics to maintain  
30 student attention. Although midterm exam performance remained unchanged, student evaluations  
31 revealed that the updated Rise360 modules were more helpful with fewer technical issues indicating  
32 that students preferred the interactive online modules to prepare for collaborative classroom exercises.  
33 Students find updated preparatory modules to be more helpful and may therefore be more likely to  
34 engage with them before class and ultimately lead to a more productive interactive classroom learning  
35 experience.

36 **Introduction:**

37 Implementation of active-learning techniques has consistently shown to enhance concept retention and  
38 student achievement [1,2]. One approach to active learning, the flipped classroom, requires that  
39 students acquire foundational knowledge outside of class and then apply this knowledge through higher  
40 order thinking and problem-solving exercises with the support of faculty and peers in class [3, 4]. Thus,  
41 student preparation outside of class is essential for successful implementation of this type of active  
42 learning technique [5]. Faculty-created modules are one way to provide students with foundational,  
43 preparatory content and have the advantage of being customized to cover specific course objectives  
44 useful for interactive classroom exercises. Students are responsible for a thorough and thoughtful

45 review of module content prior to class so that they are prepared to actively engage with faculty and  
46 peers during the classroom session.

47 The current study therefore sought to examine student perceptions of preparatory module format when  
48 learning basic cardiovascular physiology. An initial set of modules on six cardiovascular physiology  
49 concepts was created in roughly the year 2000 using Articulate Storyline, which included audio, video,  
50 and matching questions. Module topics included: membrane potential, cardiac cycle, electrocardiogram,  
51 vascular hemodynamics, cardiac output, and regulation of mean arterial pressure. Each of the six  
52 Storyline module videos had a run time of approximately one hour. Storyline modules were initially well  
53 received; however, as time has progressed they have become technologically outdated as they are not  
54 compatible with popular internet browsers and do not allow for variable speed playback.

55 Newer modules were created in Articulate Rise360 on the same six cardiovascular physiology concepts.  
56 Although content remained the same, modernized modules presented content in multiple ways  
57 including brief videos allowing variable speed playback, corresponding web-based text and graphics,  
58 interactive images, and multiple-choice check-your-understanding questions. Updated modules also  
59 divided each concept into several smaller topics. For example, cardiac cycle module topics include  
60 events of the cardiac cycle, volumes and pressures of the cardiac cycle, heart sounds, and pressure  
61 volume loops. Updated modules were introduced in a stepwise manner beginning in 2019, when  
62 students were assigned two new Rise360 modules on traditionally more complex topics, the cardiac  
63 cycle and cardiac output, and the original Storyline modules on the remaining topics. Then, beginning in  
64 2020, and in 2021, students were assigned updated Rise360 modules on all six basic cardiovascular  
65 physiology topics. The 2017-18 school years were included as a comparison group since all five modules  
66 assigned were Storyline modules. Herein we examined student, end-of-block evaluations and discovered  
67 that students found the updated Rise360 modules to be more helpful and have fewer technical issues  
68 than the original Storyline modules.

69 **Materials and Methods:**

70 Student perceptions of module format were assessed by examining end-of-block evaluations. In the  
71 evaluations, students rated modules, as well as other modes of instruction, using a 5-point Likert scale  
72 ranging from “not at all helpful” to “extremely helpful”, or by selecting, “Did not use/NA to this block”.  
73 Student ratings were compared across years using the Kruskal-Wallis Test with Mann-Whitney U test for  
74 nonparametric data (IBM SPSS, v24).

75 In addition, narrative comments that included the word ‘module’ were extracted from open-ended  
76 evaluation questions including, “Please comment about your experiences with content and  
77 organization.”, and “Which methods and/or materials were most helpful? What could have been more  
78 helpful? How?”. Narrative comments were inductively analyzed, and four common themes were  
79 identified: organizational, technical, content, and general, which were further categorized as a ‘pro’  
80 comment or a ‘con’ comment (see Figure 1 caption for details). Three independent researchers then  
81 deductively categorized themes from the student comments and discrepancies were discussed until full  
82 agreement was reached. Data was anonymously collected and analyzed in aggregate.

83

84 **Fig 1** Categorization of open-ended responses containing the word ‘module’ for each student cohort.

85 Data are presented as the percentage of comments in each category (y-axis) as well as the number of  
86 comments in each category (numerical values within bars). Comments containing the word ‘module’  
87 were extracted and inductively categorized into four themes: technical, content, organizational, and  
88 general. Technical comments discussed technical features like functionality, speed, and browser  
89 compatibility. Content comments discussed the usefulness of the modules and other non-technical  
90 aspects including the amount of detail in the module and organization of an individual module.  
91 Organizational comments discussed the flow of content and instruction throughout the block including

92 the timing of modules and their connections with other material. General comments discussed non-  
93 specific, generalized descriptions of modules. Comments were further divided into ‘pro’ and ‘con’  
94 categories based on whether the overall impression was favorable or not. Some comments included  
95 more than one sentiment and were therefore classified into multiple categories.

96  
97 Additionally, student performance on the cardiovascular block multiple-choice midterm exam was  
98 analyzed across each year using the Kruskal-Wallis Test to assess comprehension and retention  
99 differences in module format types. The general content and number of questions per topic remained  
100 similar from year to year.

101 This study was approved by the UNC-Chapel Hill Office of Human Research Studies and conducted under  
102 the guidelines of UNC IRB Study 22-2111. Consent was not obtained because all data were analyzed  
103 anonymously.

104 **Results:**

105 A Kruskal-Wallis test demonstrated that student ratings of module helpfulness increased as additional  
106 Rise360 modules were introduced,  $H(2) = 35.14$ ,  $p < 0.001$  (see Table 1 for descriptive statistics and  
107 student ratings by year). Mann-Whitney tests were used to compare all groups and showed that module  
108 helpfulness ratings in 2019 were significantly greater compared to 2017-18 ( $p = 0.022$ ), and in 2020-  
109 2021 they were significantly greater compared to 2019 ( $p = 0.006$ ) and 2017-18 ( $p < 0.001$ ). These  
110 findings suggest students were more satisfied with the quality of updated Rise360 modules compared to  
111 original Storyline modules.

112

| Course Year | 2017 - 2018 | 2019 | 2020 - 2021 |
|-------------|-------------|------|-------------|
|-------------|-------------|------|-------------|

|                        |              |              |              |
|------------------------|--------------|--------------|--------------|
| Students per group (n) | 369          | 180          | 356          |
| Module Rating; M (SD)  | 3.35 (1.24)* | 3.62 (1.10)* | 3.89 (1.09)* |

113

114 **Table 1** Modules were rated on their level of helpfulness using a 5-point Likert scale by each student  
115 cohort, 2017-18, 2019, and 2020-21. \* Statistical Significance using Kruskal-Wallis and Mann-Whitney  
116 tests ( $p < 0.05$ ). Abbreviations: n, sample size; M, mean; SD, standard deviation.

117

118 Analysis of student comments containing the word 'module' revealed an increased number of positive  
119 comments in all four categories with the implementation of updated Rise360 modules (Figure 1).  
120 Initially, in 2017-18 when students were assigned only Storyline modules, there was a high number of  
121 comments associated with technology and the majority were negative (39 technical comments total; 37  
122 con). These comments referenced the inability to access the modules in Chrome and the inability to  
123 view the module at 2x speed, among other functional issues. Over the 3-year incorporation of the  
124 Rise360 modules, the total number of technical comments decreased dramatically (37 con comments in  
125 2017-18 down to 1 con comment in 2020-21) with mostly positive comments by 2020-21 (6 technical  
126 comments total; 5 technical pro) and reference to the ease of use.

127 The overall number of comments regarding module content did not change drastically during the  
128 module updating period. However, interestingly, the percentage of positive comments for module  
129 content increased each year and in 2020-21, when all the modules assigned were Rise360 format, 85%  
130 of module content comments (75 of 88 total) were positive even though the content presented  
131 remained the same. Student comments regarding organization of content within the block including the  
132 timing of modules and their relationship to other material also decreased in number over time and there  
133 were many fewer negative organizational comments with the introduction of Rise360 modules. General

134 comments about the modules did not reference specific features and showed a similar trend with fewer  
135 general con comments after incorporating the Rise360 modules.

136 Analysis of midterm exam performance across years failed to show any significant difference: 81.2% (SD  
137 8.4) ,78.9% (SD 10.8), 80.7% (SD 9.5) for 2017-18, 2019, and 2020-21, respectively, ( $H(2) = 4.75$ ,  $p =$   
138 0.093). This finding demonstrates that the newer modules did not directly influence immediate student  
139 learning or retention.

#### 140 **Discussion:**

141 In this study cardiovascular physiology modules were thoughtfully updated with the goal of increasing  
142 student engagement and understanding of foundational cardiovascular physiology concepts. Original  
143 Storyline modules presented each of six cardiovascular physiology concepts as a single video with a run  
144 time of approximately one hour, a format which may be challenging or overwhelming for students to  
145 process and comprehend. Updated Rise360 modules presented topics using multiple learning  
146 modalities, which appeals to a variety of learning preferences and encourages a wide range of students  
147 to interact with content. In addition, Rise360 modules separated each concept into smaller parts to  
148 allow easier navigation, prevent distraction, and facilitate completion without interruption.

149 Our analysis of student evaluation ratings and comments revealed that Rise360 modules were more  
150 helpful and had fewer technical issues than the original Storyline modules. Previous research  
151 demonstrates that interactive modules increase student study time [6] which may enhance active  
152 learning classroom activities. In addition to study time, increased usage may also translate into a greater  
153 number of students that engage with the modules at a time when engagement is dwindling [7]. One  
154 limitation of the current study; however, is that our institution's learning management system was not  
155 configured to track the number of students that opened modules or the amount of time each student  
156 spent interacting with the modules. Although student evaluations suggest there was more engagement

157 with the updated modules, we are unable to directly compare student interaction between the different  
158 module styles.

159 Interactive modules that provide learner control, graphics and videos, and self-assessments have shown  
160 to significantly increase medical student learning of basic science concepts [8, 9]. The present study  
161 confirms that students found the updated Rise360 modules containing these features to be more  
162 helpful. However, regardless of the module format assigned, student performance on the cardiovascular  
163 midterm exam remained unchanged. Our findings are consistent with other mixed results on the impact  
164 of modules [6] and flipped classrooms [4] on promoting knowledge acquisition and retention.

165 One complicating factor in our study is that overall exam performance has declined over the past several  
166 years, perhaps due in part to the stress of the COVID-19 pandemic. Pandemic-related stress has shown  
167 to negatively impact mental health and exam performance in medical students [10, 11]. It is possible to  
168 consider that students' cardiovascular midterm exam scores may have also significantly declined if not  
169 for the updated Rise360 modules. Additional research is needed to determine whether this may be the  
170 case and to further investigate specific module features that may enhance student learning.

171 In conclusion, our findings suggest that careful consideration of preparatory material format is critical  
172 for maximum student satisfaction in preparation for active learning classroom activities. Presenting  
173 preparatory modules in a modern, interactive format with self-assessment improves student  
174 perceptions of the materials. Students find updated preparatory modules to be more helpful and may  
175 therefore be more likely to engage with them before class, which may lead to a more productive  
176 interactive classroom learning experience.

#### 177 **References:**

- 178 1. Freeman S, Eddy SL, McDonough M, Smith MK, Okoroafor N, Jordt H, Wenderoth MP. Active learning  
179 increases student performance in science, engineering, and mathematics. Proc Natl Acad Sci U S A.  
180 2014; <https://doi.org/10.1073/pnas.1319030111>
- 181 2. Rossi IV, de Lima JD, Sabatke B, Nunes MAF, Ramirez GE, Ramirez MI. Active learning tools improve

182 the learning outcomes, scientific attitude, and critical thinking in higher education: Experiences in an  
183 online course during the COVID-19 pandemic. *Biochem Mol Biol Educ*. 2021;  
184 <https://doi.org/10.1002/bmb.21574>

185 3. Street S, Gilliland KO, McNeil S, Royal K. The flipped classroom improved medical student  
186 performance and satisfaction in a pre-clinical physiology course. *Med Sci Educ*. 2015;  
187 <https://doi.org/10.1007/s40670-014-0092-4>.

188 4. Chen F, Lui AM, Martinelli SM. A systematic review of the effectiveness of flipped classrooms in  
189 medical education. *Med Educ*. 2017 <https://doi.org/10.1111/medu.13272>

190 5. Persky AM, McLaughlin JE. The Flipped Classroom - From Theory to Practice in Health Professional  
191 Education. *Am J Pharm Educ*. 2017; <https://doi.org/10.5688/ajpe816118>

192 6. Bryner BS, Saddawi-Konefka D, Gest TR. 2008. The impact of interactive, computerized educational  
193 modules on preclinical medical education. *Anat Sci Educ*. 2008; <https://doi.org/10.1002/ase.55>

194 7. White C, Bradley E, Martindale J, Roy P, Patel K, Yoon M, Worden MK. Why are medical students  
195 'checking out' of active learning in a new curriculum? *Med Educ*. 2014;  
196 <https://doi.org/10.1111/medu.12356>

197 8. Khalil MK, Nelson LD, Kibble JD. The use of self-learning modules to facilitate learning of basic science  
198 concepts in an integrated medical curriculum. *Anat Sci Educ*. 2010; <https://doi.org/10.1002/ase.177>

199 9. Velan GM, Killen MT, Dziegielewski M, Kumar RK. Development and evaluation of a computer-assisted  
200 learning module on glomerulonephritis for medical students. *Med Teach* 2002;  
201 <https://doi.org/10.1080/01421590220145806>

202 10. Zis P, Artemiadis A, Bargiotas P, Nteveros A, Hadjigeorgiou GM. Medical studies during the COVID-19  
203 pandemic: the impact of digital learning on medical students' burnout and mental health. *Int J Environ*  
204 *Res Public Health*. 2021; <https://doi.org/10.3390/ijerph18010349>.

205 11. Andersen S, Leon G, Patel D, Lee C, Simanton E. The Impact of COVID-19 on Academic Performance  
206 and Personal Experience Among First-Year Medical Students. *Med Sci Educ*. 2022;  
207 <https://doi.org/10.1007/s40670-022-01537-6>.

208  
209  
210  
211  
212  
213  
214  
215  
216  
217  
218  
219  
220  
221  
222  
223



# Categorization of Student Comments on Modules



Figure
